# Supplementary material for: Insight into the connecting roles of interaction synthons and water clusters within different transition metal coordination compounds of pyridine-2,5-dicarboxylic acid: experimental and theoretical studies
Source: Royal Society of Chemistry journal article supplement (doi:10.1039/c3ce40743h), 2013-01-01

## Supporting Information

### Insight into the connecting roles of interaction synthons and water clusters within different transition metal coordination compounds of pyridine-2,5-dicarboxylic acid: experimental and theoretical studies

H. Eshtiagh-Hosseini, M. Mirzaei,\* M. Biabani, V. Lippolis,\* M. Chahkandi and C. Bazzicalupi

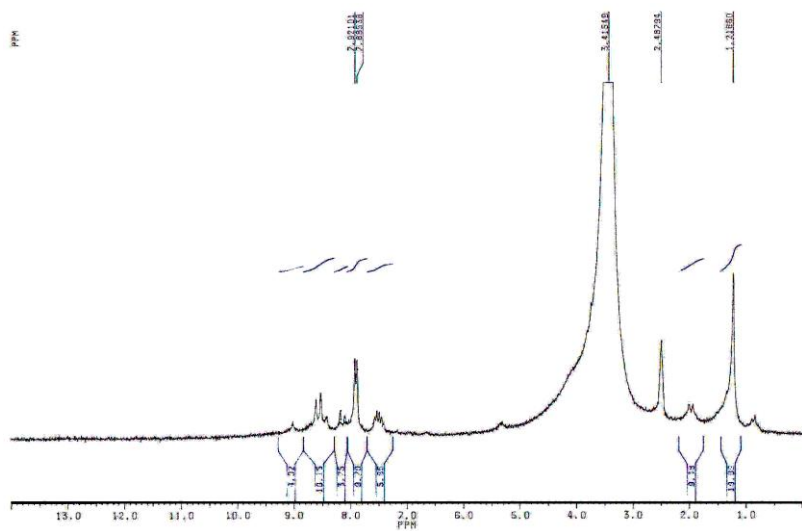

Figure S1. <sup>1</sup>H-NMR spectrum of compound **2**.

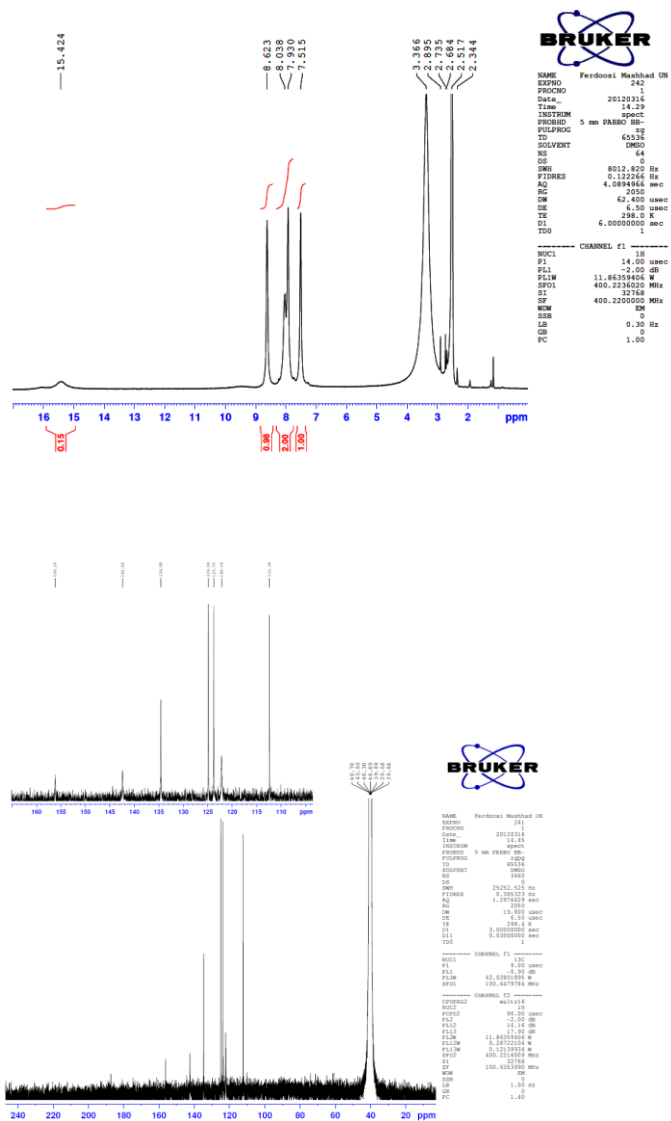

Figure S2. <sup>1</sup>H- and <sup>13</sup>C-NMR spectra of compound 3.

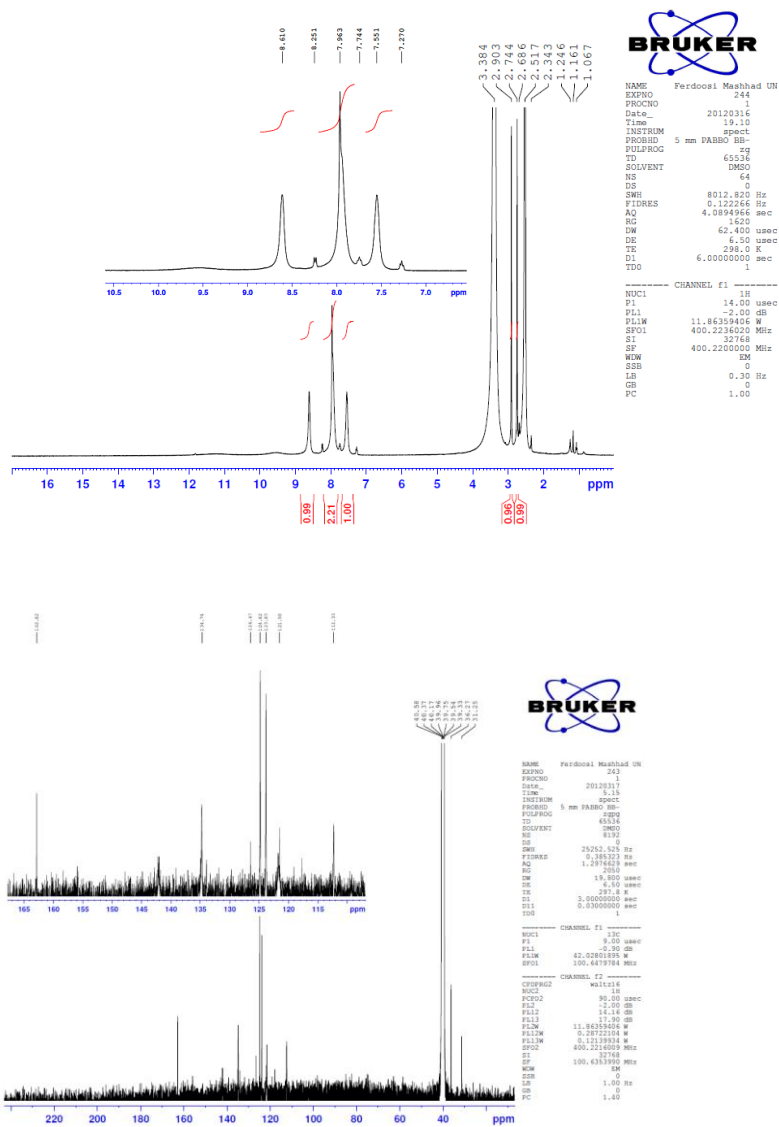

Figure S3. <sup>1</sup>H- and <sup>13</sup>C-NMR spectra of compound 4.

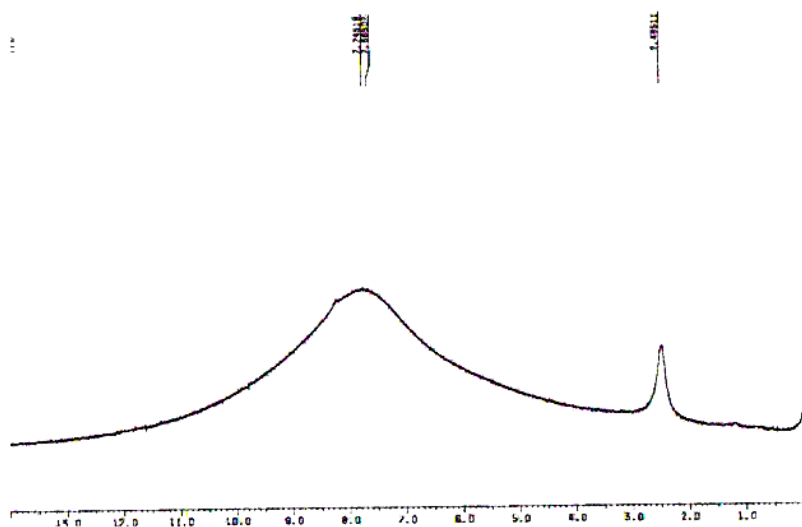

**Figure S4.** <sup>1</sup>H-NMR spectrum of compound 5.

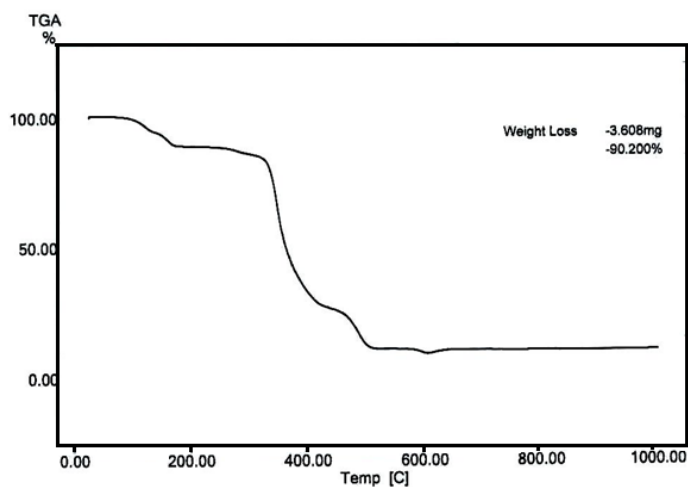

**Figure S5.** The TG curve of compound 2.

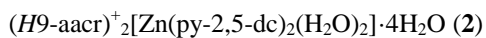

A TGA analysis for compound, **2** was performed in the temperature range of 5-1000°C (Fig. S5). The TG curve shows that this compound exhibits three steps of weight loss. The first stages are related to removal of crystallization water molecules and coordinated water molecules in the range 110-160 °C (found: 11.35%, calcd: 12.09%), The second stage in the range 340-400 °C is related to the release of 9-aacr ligands and one py-2,5-dc ligand (found: 61.32%, calcd:62.02%). The third stage from 450 to 500 °C corresponds to the loss of second py-2,5-dc molecule (found: 18.08%, calcd: 18.46%). The final decomposition product is ZnO (found: 9.25%, calcd: 9.10%).

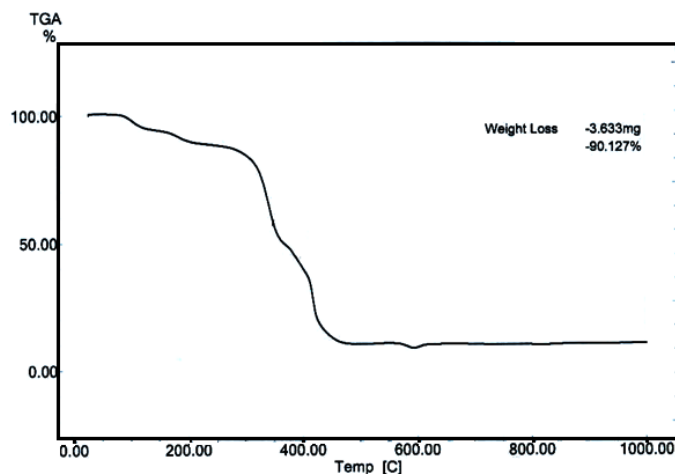

**Figure S6.** The TG curve of compound **3**.

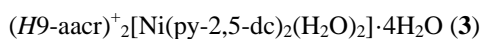

A thermogravimetric analysis for compound, **3**, was performed in the temperature range of 5-1000°C (Fig. S6). The TG curve shows that this compound exhibits three steps of weight loss. The first stages are related to removal of two coordinated water and four non-coordinated water molecules in the range 95-190°C (found: 11.39%, calcd: 12.20%). The second step between 300 and 400°C is related to the release of the 9-aacr ligands (found: 39.97%, calcd: 44.06%). The third stage between 400 and 420°C corresponds to the loss of py-2,5-dc molecules (found: 39.05%, calcd: 37.26%). The final decomposition product is NiO (found: 9.5%, calcd: 8.4%).

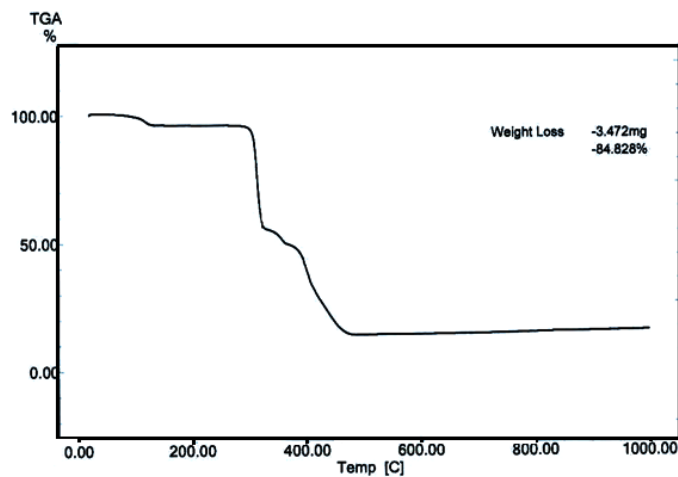

**Figure S7.** The TG curve of compound **4**.

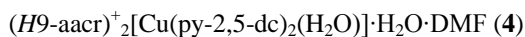

The TG curve shows that this compound exhibits four steps of weight (Fig. S7). First step of decomposition of **4** from 100-150°C are related to removal of coordinated and non-coordinated water molecules (found: 4.13%, calcd: 4.03%). The second step corresponds to the loss of two 9-aacr ligands in the range 315 °C (found: 41.00%, calcd: 43.71%). The third stage between 300 and 350°C are related to the release of DMF molecule (found: 6.08%, calcd: 8.18%). The fourth stage between 350 and 400°C corresponds to the loss of two py-2,5dc molecules (found: 35.06%, calcd: 35.82%). The final decomposition product is CuO and CO<sub>2</sub> (found: 13.79%, calcd: 13.83%).

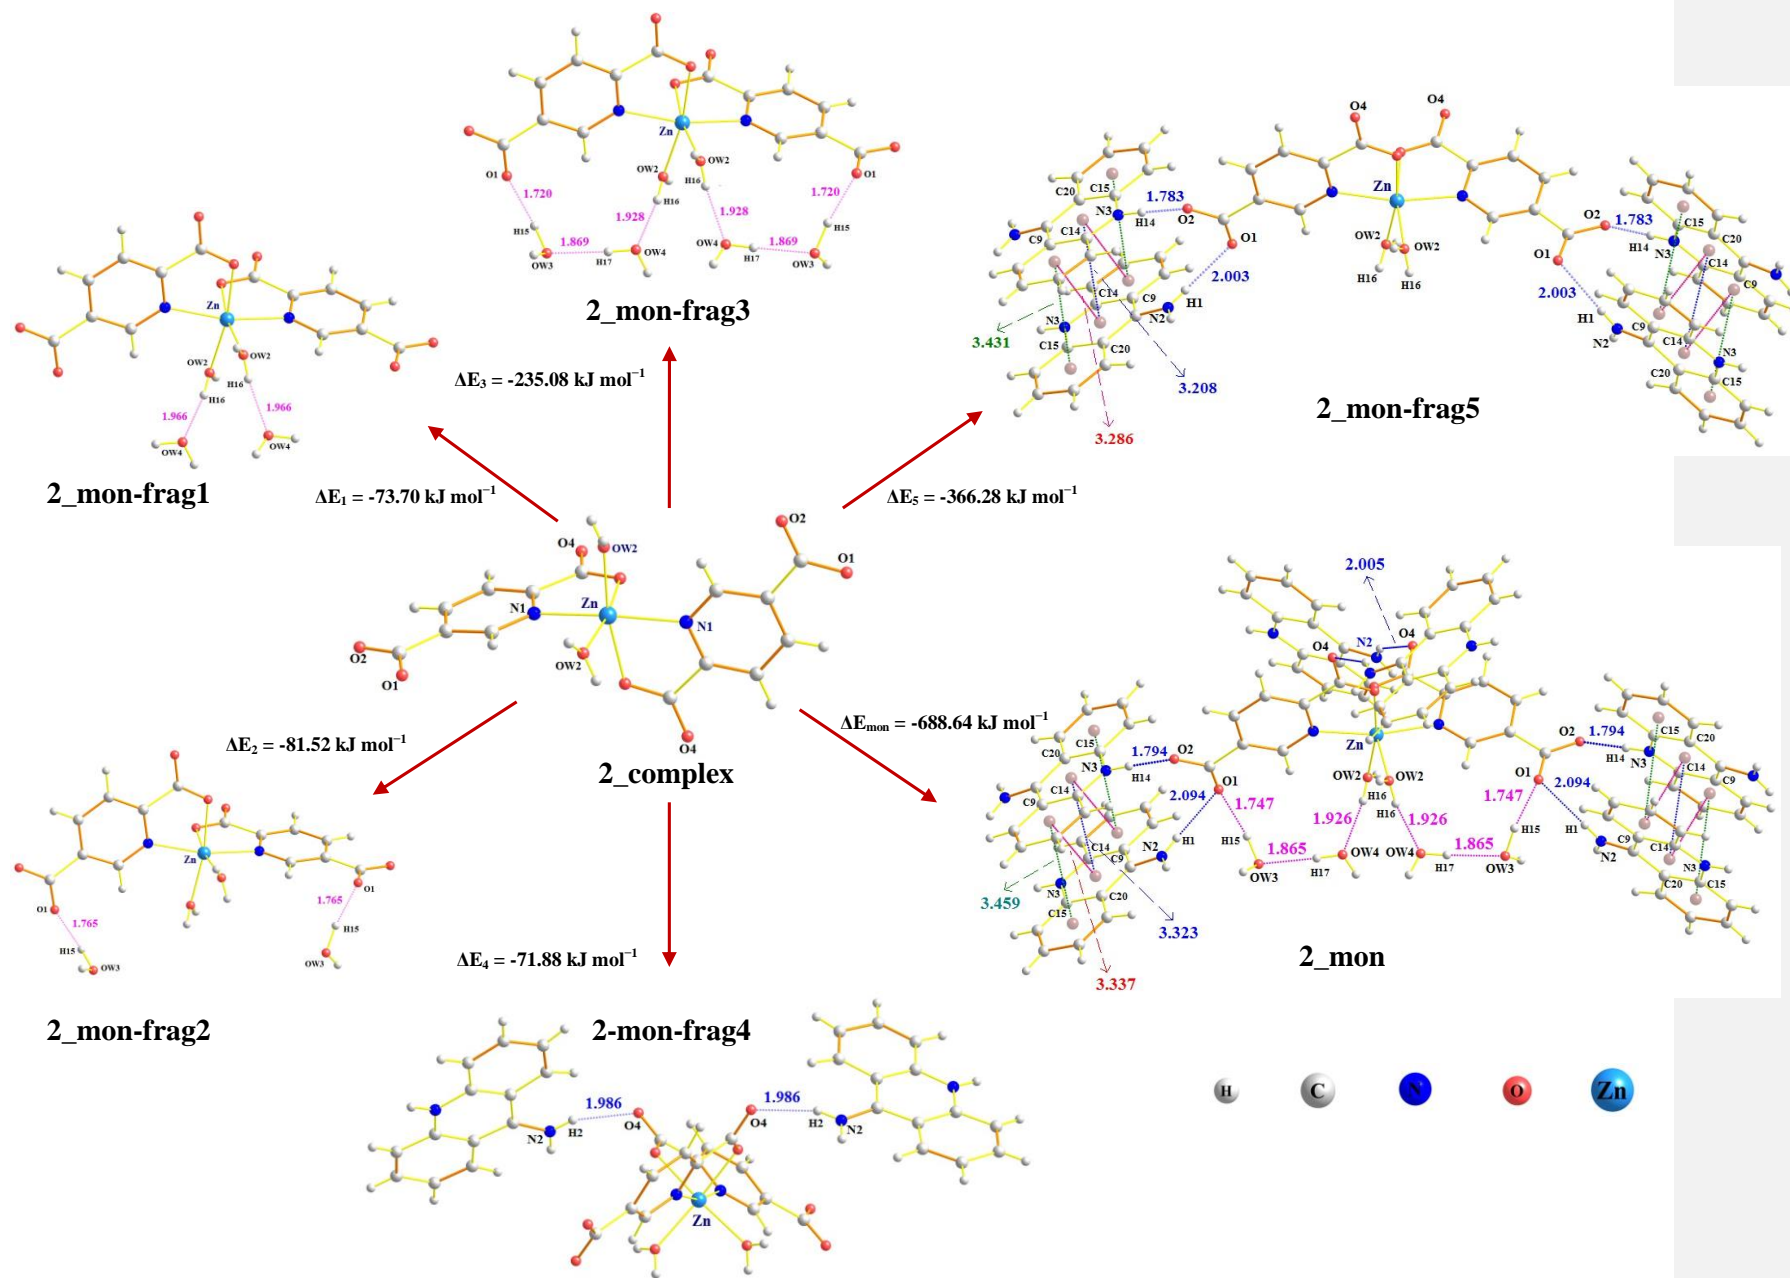



**Figure S8.** The Formation energy of **2\_mon** starting from the  $[\text{Zn}(\text{py-2,5-dc})_2(\text{H}_2\text{O})_2]^{2-}$  metal complex (**2\_complex**).

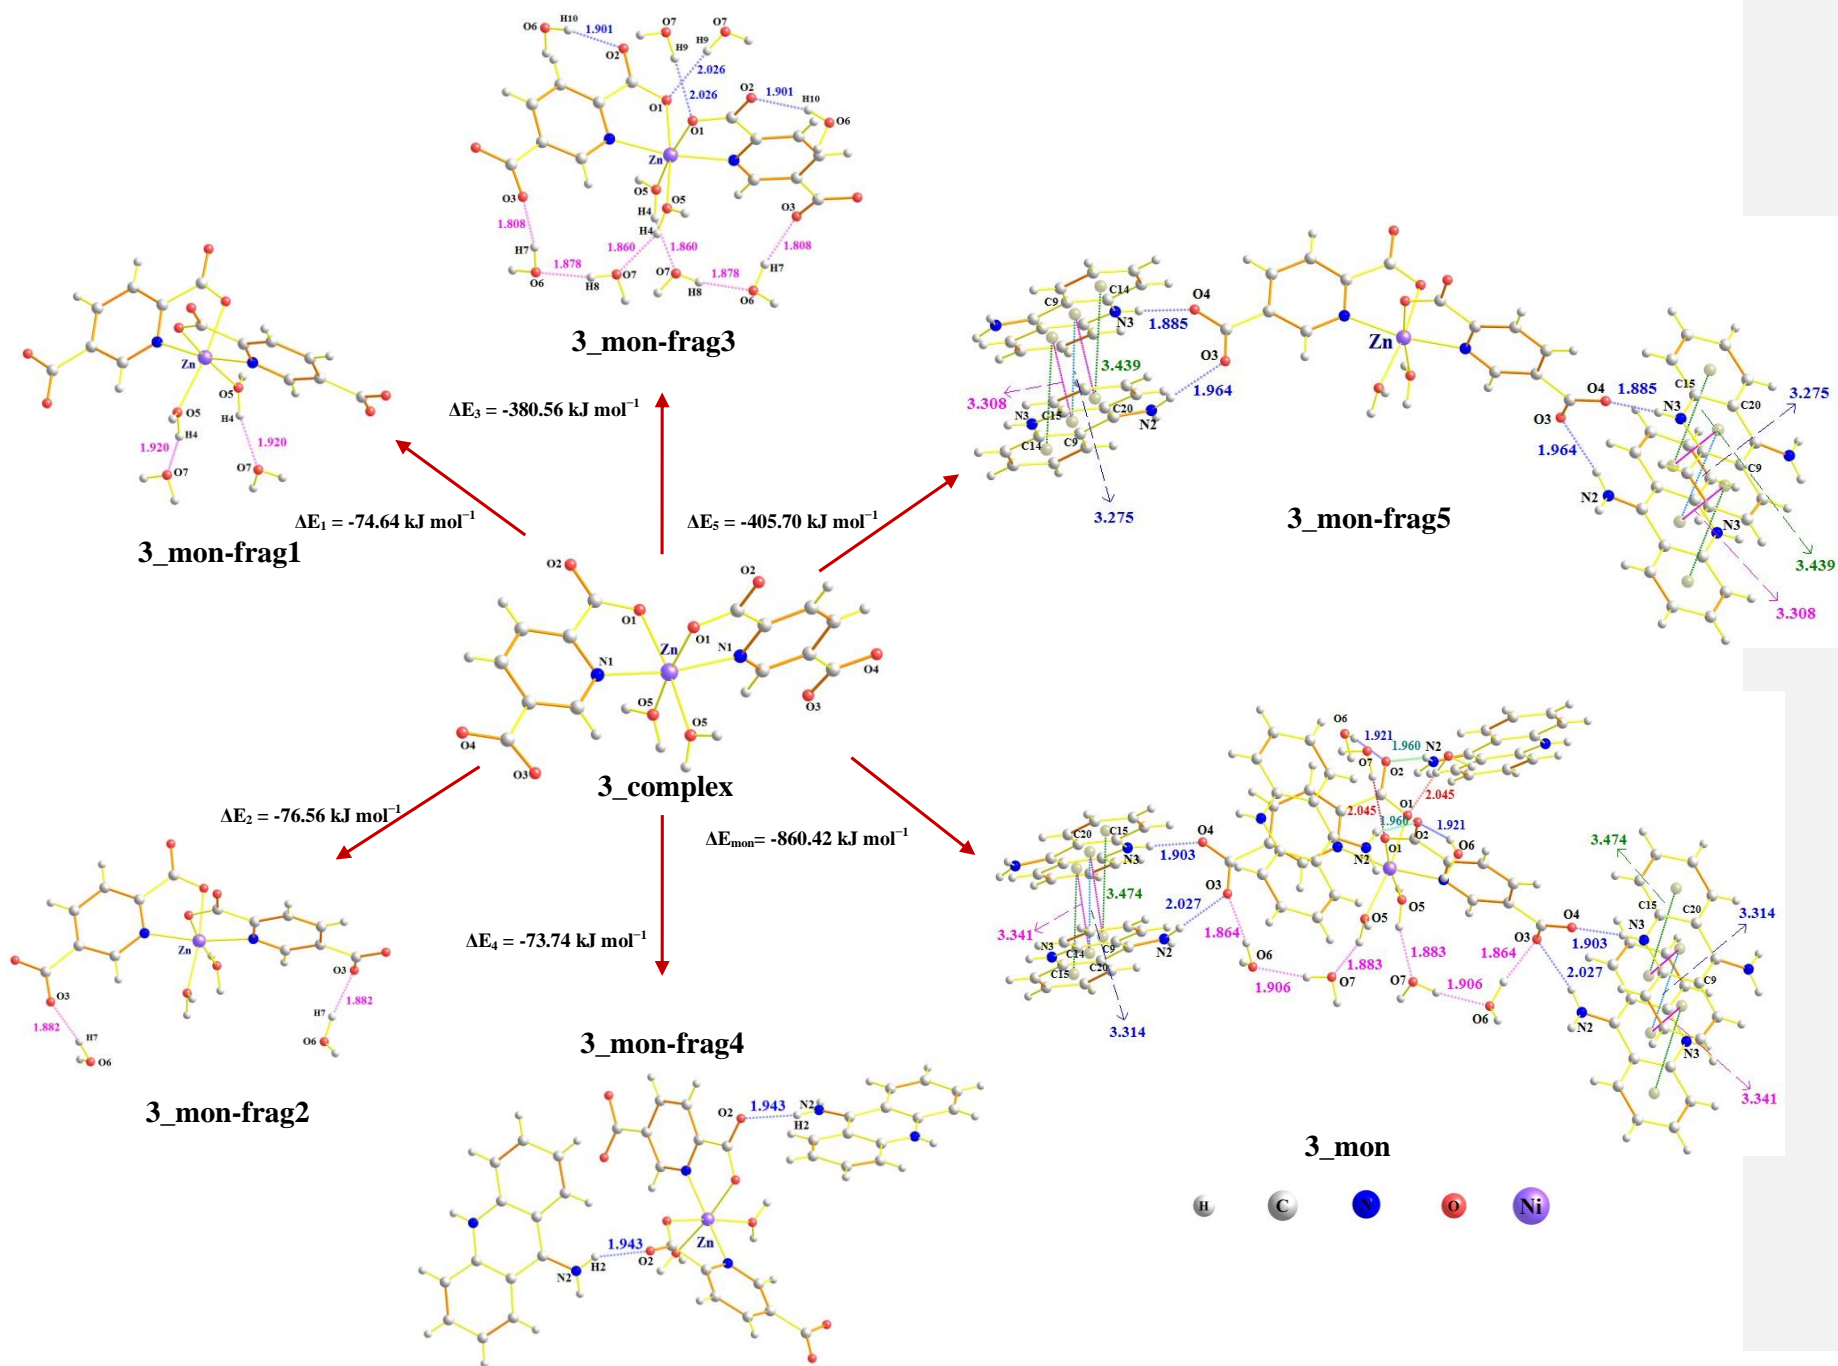

**Figure S9.** The Formation energy of 3\_mon starting from the  $[\text{Ni}(\text{py-2,5-dc})_2(\text{H}_2\text{O})_2]^{2-}$  metal complex (**3\_complex**).

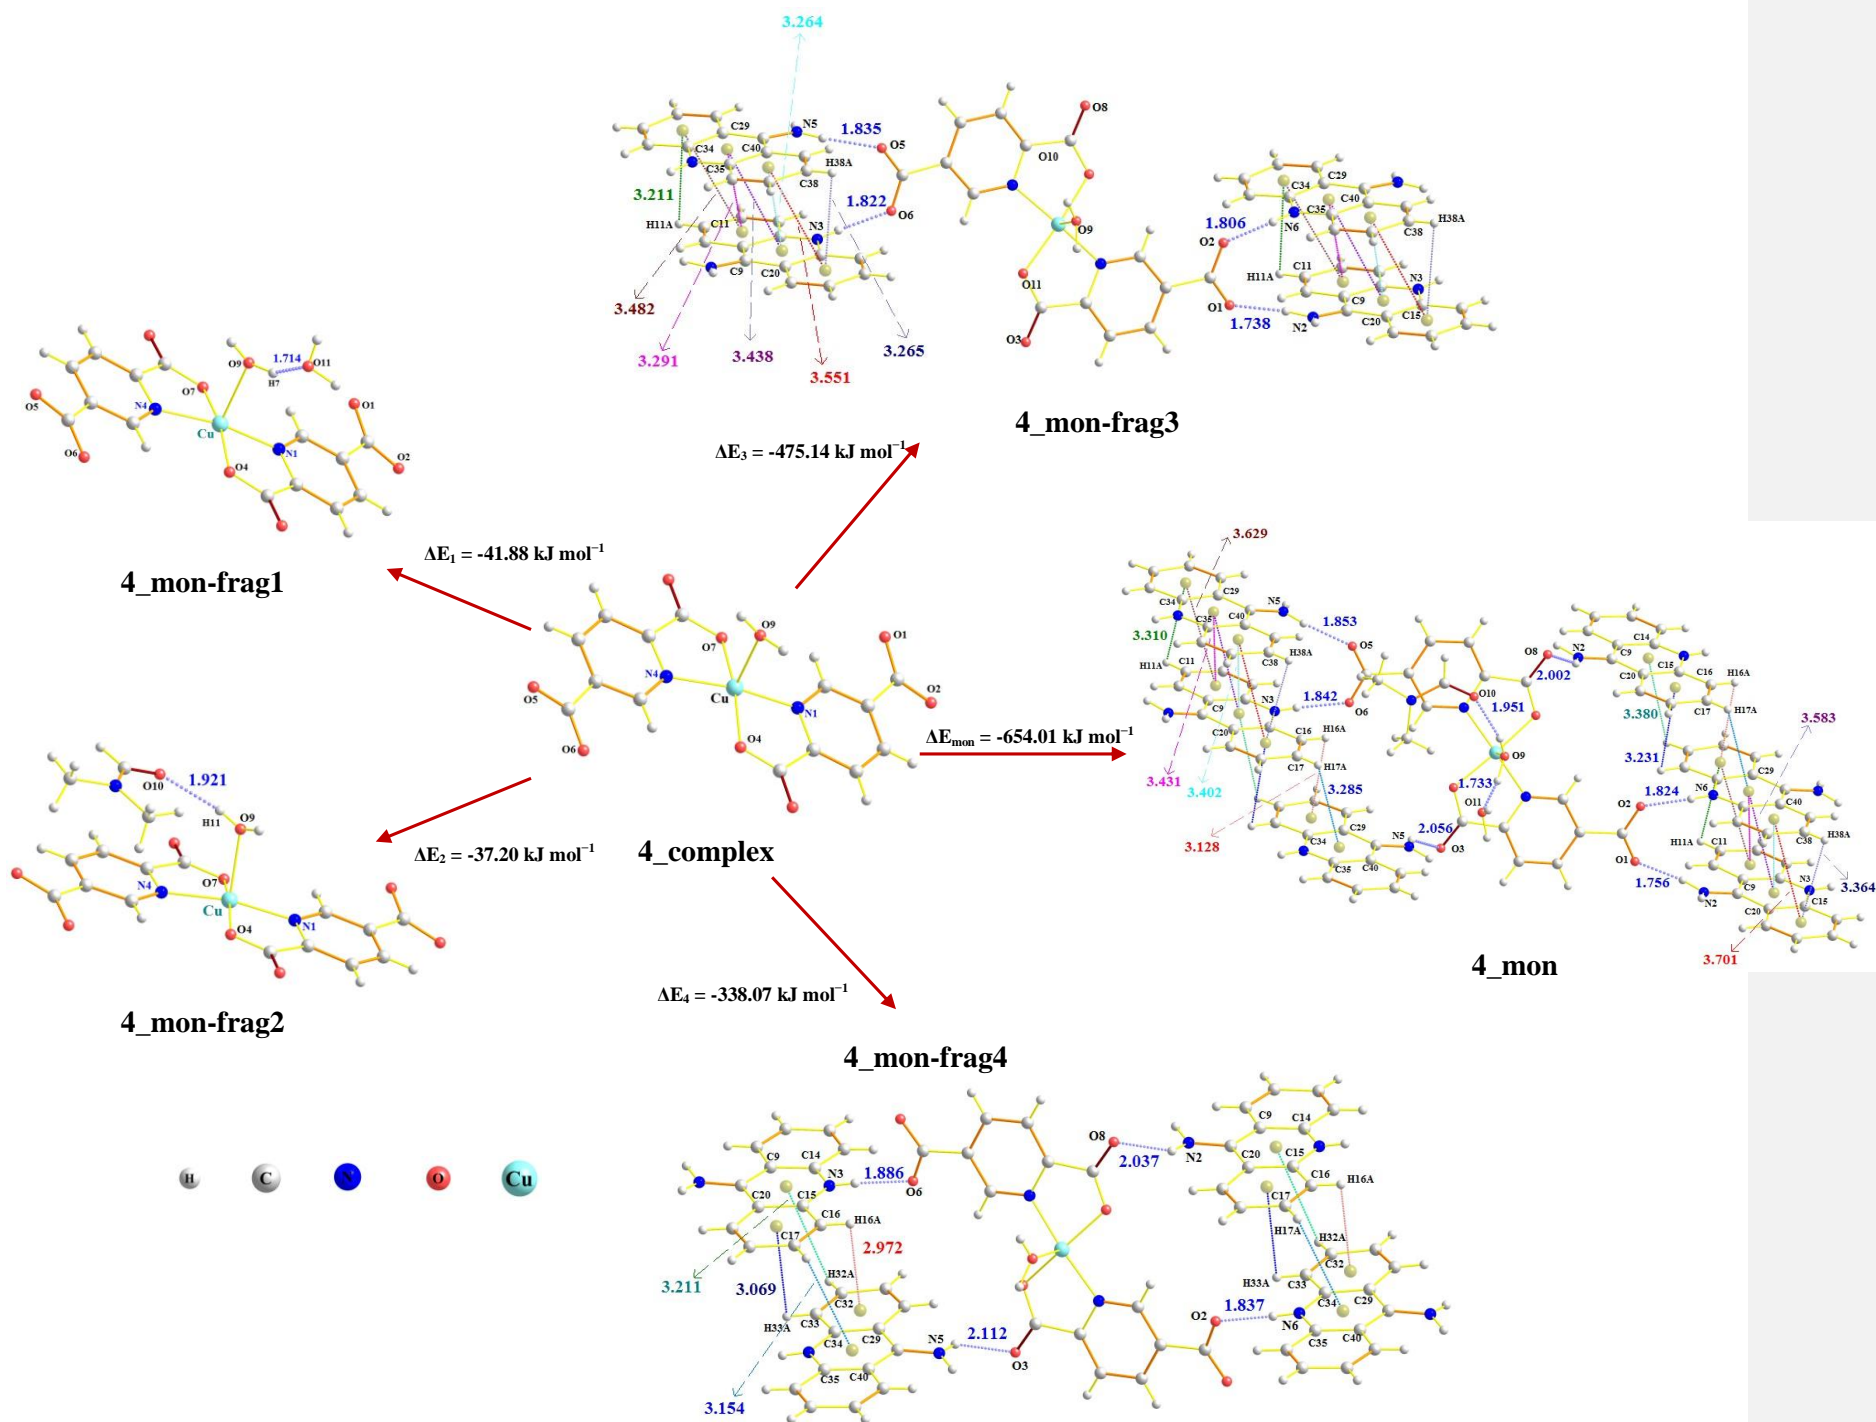

**Figure S10.** The Formation energy of **4\_mon** starting from the  $[\text{Cu}(\text{py-2,5-dc})_2(\text{H}_2\text{O})]^{2-}$  metal complex (**4\_complex**).

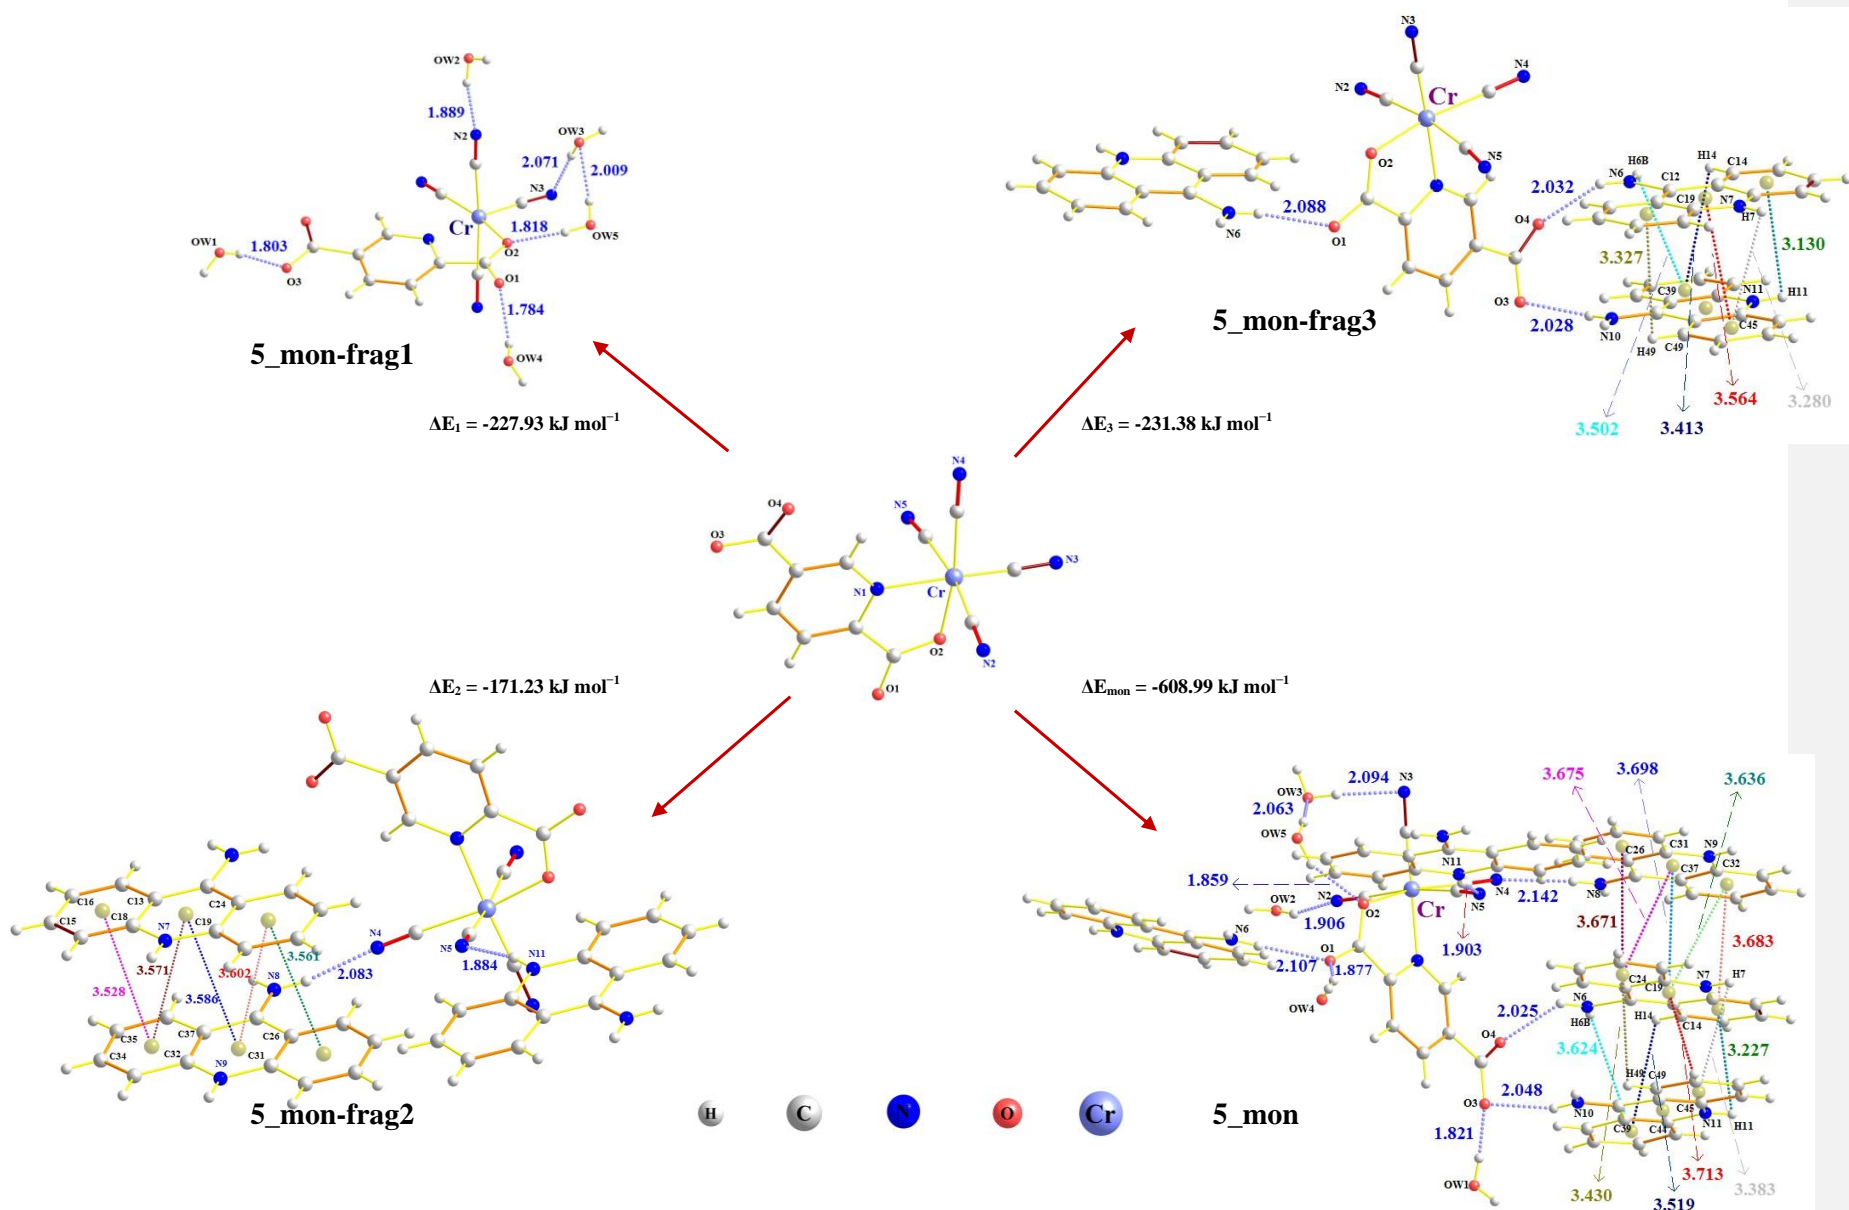

**Figure S11.** The Formation energy of **5\_mon** starting from the  $[\text{Cr}(\text{CN})_4(\text{py-2,5-dc})]^{3-}$  metal complex (**5\_complex**)

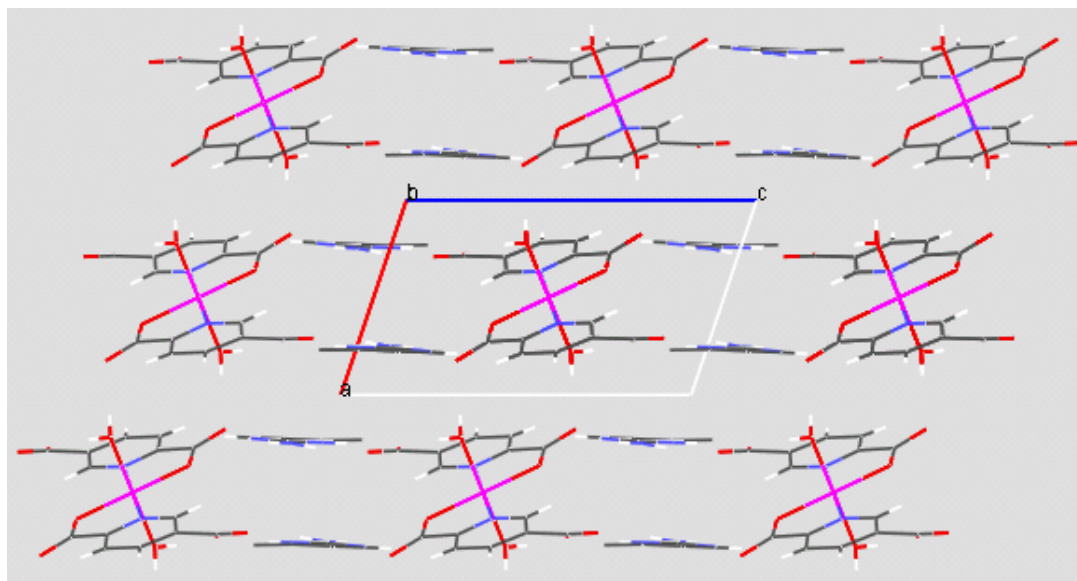

**Figure S12.** Crystal packing diagram of compound **1** showing a columnar distribution of the anionic and cationic fragments.



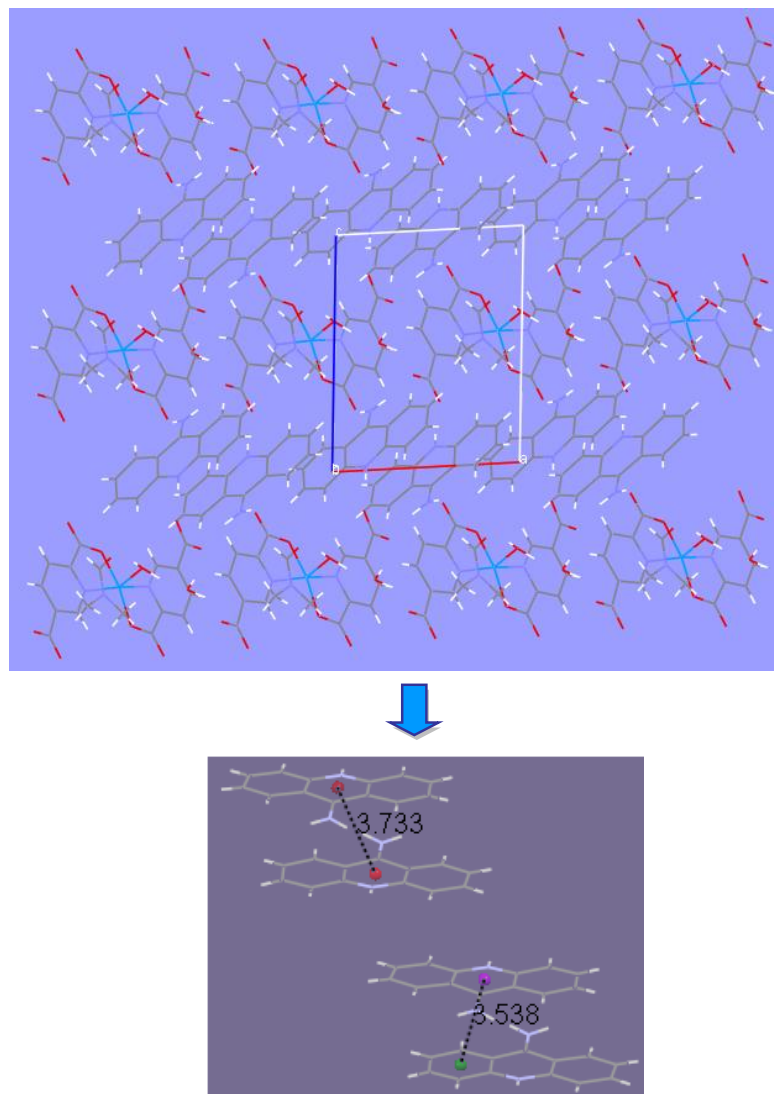

**Figure S13.** Crystal Packing diagram of the compound **4** and  $\pi$ - $\pi$  stacking interactions between cationic species centers of  $(H9\text{-aacr})^+$ .

Formatted: Font color: Re

Formatted: Font color: Re

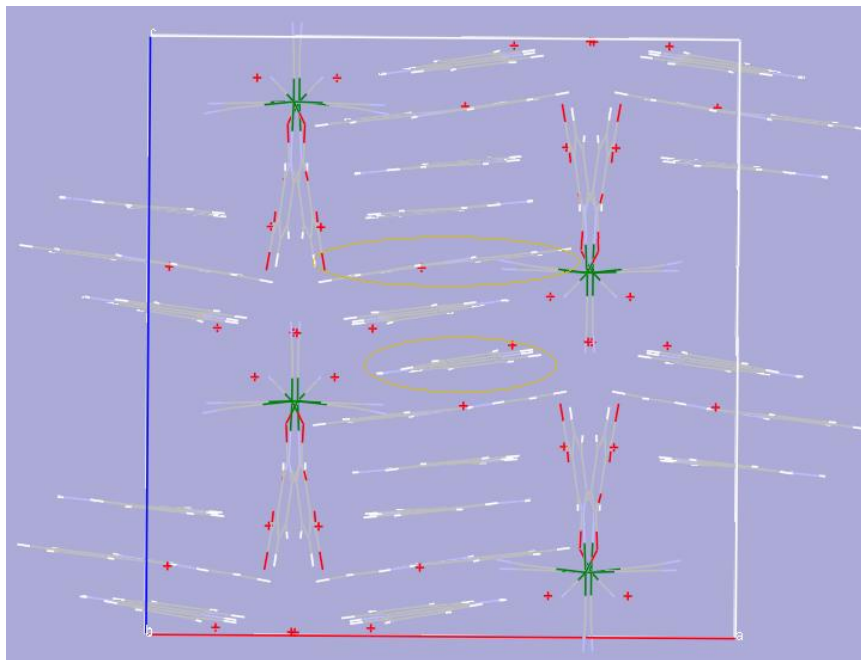

**Figure S14.** Crystal packing diagram of compound **5** (water molecules omitted) and schematic image of  $\pi$ - $\pi$  stacking interactions between (*H9*-acr)<sup>+</sup> cationic units viewed along the *b* axis.

Formatted: Font color: Red

**Table S1.** Selected experimental and calculated bond lengths (Å) and angles (°) for compounds 1–5.

| Compound 1                   | Experimental | Calculated |                              | Experimental | Calculated |
|------------------------------|--------------|------------|------------------------------|--------------|------------|
| Zn–O(1)                      | 2.0733(16)   | 2.0526     | N(1 <sup>1</sup> )–Zn–N(1)   | 180.000(1)   | 178.12     |
| Zn–N(1)                      | 2.1086(19)   | 2.0882     | O(1)–Zn–OW(1)                | 90.99(7)     | 87.32      |
| Zn–OW(1)                     | 2.1671(17)   | 2.1453     | N(1)–Zn–OW(1)                | 91.51(7)     | 90.37      |
| O(1 <sup>1</sup> )–Zn–O(1)   | 180.000(1)   | 175.26     | O(1)–Zn–OW(1 <sup>1</sup> )  | 89.01(7)     | 88.30      |
| O(1)–Zn–N(1 <sup>1</sup> )   | 100.55(7)    | 98.36      | N(1)–Zn–OW(1 <sup>1</sup> )  | 88.49(7)     | 90.28      |
| O(1)–Zn–N(1)                 | 79.45(7)     | 74.67      | OW(1)–Zn–OW(1 <sup>1</sup> ) | 180.0        | 179.04     |
| <b>Compound 2</b>            |              |            |                              |              |            |
| Zn–OW(1)                     | 2.095(2)     | 2.107      | O(3 <sup>1</sup> )–Zn–O(3)   | 88.45(11)    | 89.70      |
| Zn–O(3)                      | 2.1140(19)   | 2.095      | OW(1)–Zn–N(1)                | 91.90(8)     | 90.43      |
| Zn–N(1)                      | 2.136(2)     | 2.127      | O(3 <sup>1</sup> )–Zn–N(1)   | 92.74(8)     | 93.72      |
| OW(1 <sup>1</sup> )–Zn–OW(1) | 90.37(14)    | 88.56      | O(3)–Zn–N(1)                 | 78.45(8)     | 75.08      |
| OW(1 <sup>1</sup> )–Zn–O(3)  | 91.40(9)     | 95.06      | OW(1)–Zn–N(1 <sup>1</sup> )  | 96.71(8)     | 92.33      |
| OW(1)–Zn–O(3)                | 170.33(7)    | 167.39     | OW(1)–Zn–N(1)                | 91.90(8)     | 91.03      |
| <b>Compound 3</b>            |              |            |                              |              |            |
| Ni–O(1)                      | 2.0679(18)   | 2.0582     | O(1)–Ni–OW(1)                | 172.67(7)    | 173.22     |
| Ni–N(1)                      | 2.080(2)     | 2.0588     | N(1)–Ni–OW(1)                | 92.41(8)     | 89.03      |
| Ni–OW(1)                     | 2.081(2)     | 2.0590     | O(1)–Ni–OW(1 <sup>1</sup> )  | 90.96(8)     | 91.36      |
| O(1)–Ni–O(1 <sup>1</sup> )   | 88.47(10)    | 87.60      | N(1)–Ni–OW(1 <sup>1</sup> )  | 94.64(8)     | 95.58      |
| O(1)–Ni–N(1 <sup>1</sup> )   | 92.47(8)     | 91.90      | OW(1)–Ni–OW(1 <sup>1</sup> ) | 90.53(12)    | 88.46      |
| O(1)–Ni–N(1)                 | 80.31(8)     | 79.55      | O(1)–Ni–OW(1)                | 172.67(7)    | 173.87     |
| <b>Compound 4</b>            |              |            |                              |              |            |
| Cu–O(4)                      | 1.959(3)     | 1.977      | N(1)–Cu–N(4)                 | 168.58(11)   | 172.45     |
| Cu–O(7)                      | 1.960(3)     | 1.982      | O(4)–Cu–OW(1)                | 98.90(10)    | 99.37      |
| Cu–N(1)                      | 1.972(3)     | 1.985      | O(7)–Cu–OW(1)                | 94.02(10)    | 97.52      |
| Cu–N(4)                      | 1.975(3)     | 1.982      | N(1)–Cu–OW(1)                | 99.12(10)    | 97.20      |
| Cu–OW(1)                     | 2.204(2)     | 2.216      | N(4)–Cu–OW(1)                | 92.30(10)    | 95.16      |
| O(4)–Cu–O(7)                 | 166.96(10)   | 165.30     |                              |              |            |
| O(4)–Cu–N(1)                 | 83.69(11)    | 85.49      |                              |              |            |
| O(7)–Cu–N(1)                 | 96.10(11)    | 92.82      |                              |              |            |
| O(4)–Cu–N(4)                 | 94.51(11)    | 93.87      |                              |              |            |
| O(7)–Cu–N(4)                 | 83.10(11)    | 84.91      |                              |              |            |
| <b>Compound 5</b>            |              |            |                              |              |            |
| Cr(01)–C(9)                  | 1.683(5)     | 1.667      | C(9)–Cr(01)–N(1)             | 174.6(2)     | 177.18     |
| Cr(01)–O(2)                  | 1.959(4)     | 1.940      | O(2)–Cr(01)–N(1)             | 79.06(16)    | 82.90      |
| Cr(01)–C(8)                  | 2.048(7)     | 2.028      | C(8)–Cr(01)–N(1)             | 87.8(2)      | 86.22      |
| Cr(01)–C(10)                 | 2.065(7)     | 2.047      | C(10)–Cr(01)–N(1)            | 92.3(2)      | 92.06      |
| Cr(01)–C(11)                 | 2.076(6)     | 2.057      | C(11)–Cr(01)–N(1)            | 84.25(19)    | 86.57      |
| Cr(01)–N(1)                  | 2.100(4)     | 2.083      | C(9)–Cr(01)–O(2)             | 96.6(2)      | 93.35      |
| C(9)–Cr(01)–C(8)             | 95.3(2)      | 97.13      |                              |              |            |
| O(2)–Cr(01)–C(8)             | 88.4(2)      | 85.10      |                              |              |            |
| C(9)–Cr(01)–C(10)            | 91.9(2)      | 92.82      |                              |              |            |
| O(2)–Cr(01)–C(10)            | 171.15(19)   | 173.49     |                              |              |            |
| C(9)–Cr(01)–C(11)            | 93.2(2)      | 96.64      |                              |              |            |
| O(2)–Cr(01)–C(11)            | 87.2(2)      | 90.38      |                              |              |            |
| C(8)–Cr(01)–C(11)            | 171.5(2)     | 175.50     |                              |              |            |
| C(10)–Cr(01)–C(11)           | 90.1(2)      | 92.24      |                              |              |            |

<sup>1</sup>Symmetry code: (i)  $-x+1, -y+1, -z+1$ . <sup>2</sup>Symmetry code: (i)  $-x+1, y, -z+3/2$ . <sup>3</sup>Symmetry code: (i)  $-x, y, -z-1/2$ .

**Table S2.** The Non-Covalent Interactions Distances (Å), Angles (°), and Binding Energies (kcal mol<sup>-1</sup>) of **1\_mon** to **5\_mon** calculated with B3LYP-D/ triple- $\zeta$  6-311+G(*d, p*).

| Interactions                                        | d(H...A) | < (DHA) | Binding Energy | Interactions                                           | d(H...A) | < (DHA) | Binding Energy |
|-----------------------------------------------------|----------|---------|----------------|--------------------------------------------------------|----------|---------|----------------|
| <b>1_mon</b>                                        |          |         |                |                                                        |          |         |                |
| N <sub>4</sub> -H <sub>4</sub> ...O <sub>2</sub>    | 1.891    | 170.63  | 37.73          | N <sub>3</sub> -H <sub>6</sub> ...O <sub>4</sub>       | 1.773    | 175.43  | 40.24          |
| N <sub>4</sub> -H <sub>5</sub> ...O <sub>3</sub>    | 1.767    | 177.11  | 40.38          |                                                        |          |         |                |
| <b>2_mon</b>                                        |          |         |                |                                                        |          |         |                |
| N <sub>2</sub> -H <sub>1</sub> ...O <sub>1</sub>    | 2.094    | 155.67  | 33.57          | OW <sub>4</sub> -H <sub>17</sub> ...OW <sub>3</sub>    | 1.865    | 177.28  | 39.04          |
| N <sub>3</sub> -H <sub>14</sub> ...O <sub>2</sub>   | 1.794    | 173.20  | 40.56          | $\pi_{C15-C20}$ ... $\pi_{C9-C14}$                     | 3.495    | 180.00  | 20.83          |
| N <sub>2</sub> -H <sub>2</sub> ...O <sub>4</sub>    | 2.005    | 149.51  | 36.31          | $\pi_{C8-N3}$ ... $\pi_{C9-C14}$                       | 3.337    | 180.00  | 21.82          |
| OW <sub>3</sub> -H <sub>15</sub> ...O <sub>1</sub>  | 1.747    | 161.34  | 41.07          | $\pi_{N3-C15}$ ... $\pi_{N3-C15}$                      | 3.323    | 180.00  | 20.66          |
| OW <sub>2</sub> -H <sub>16</sub> ...OW <sub>4</sub> | 1.926    | 176.70  | 37.81          |                                                        |          |         |                |
| <b>3_mon</b>                                        |          |         |                |                                                        |          |         |                |
| N <sub>3</sub> -H <sub>3</sub> ...O <sub>4</sub>    | 1.903    | 173.26  | 38.26          | O <sub>7</sub> -H <sub>9</sub> ...O <sub>1</sub>       | 2.045    | 176.31  | 35.61          |
| N <sub>2</sub> -H <sub>1</sub> ...O <sub>3</sub>    | 2.027    | 154.30  | 35.92          | O <sub>7</sub> -H <sub>8</sub> ...O <sub>6</sub>       | 1.906    | 169.14  | 38.20          |
| N <sub>2</sub> -H <sub>2</sub> ...O <sub>2</sub>    | 1.960    | 151.32  | 37.15          | $\pi_{C15-C20}$ ... $\pi_{C9-C14}$                     | 3.474    | 180.00  | 20.96          |
| O <sub>5</sub> -H <sub>4</sub> ...O <sub>7</sub>    | 1.883    | 155.29  | 38.67          | $\pi_{N3-C15}$ ... $\pi_{C9-C14}$                      | 3.341    | 180.00  | 21.79          |
| O <sub>6</sub> -H <sub>7</sub> ...O <sub>3</sub>    | 1.864    | 168.75  | 39.06          | $\pi_{N3-C15}$ ... $\pi_{N3-C15}$                      | 3.314    | 180.00  | 21.97          |
| O <sub>6</sub> -H <sub>10</sub> ...O <sub>2</sub>   | 1.921    | 154.94  | 37.90          |                                                        |          |         |                |
| <b>4_mon</b>                                        |          |         |                |                                                        |          |         |                |
| N <sub>6</sub> -H <sub>4</sub> ...O <sub>2</sub>    | 1.824    | 173.80  | 39.92          | C <sub>17</sub> -H <sub>17A</sub> ... $\pi_{N6-C34}$   | 3.285    | 100.25  | 22.16          |
| N <sub>2</sub> -H <sub>3</sub> ...O <sub>1</sub>    | 1.756    | 160.35  | 41.46          | C <sub>33</sub> -H <sub>33A</sub> ... $\pi_{C15-C20}$  | 3.231    | 88.37   | 22.53          |
| N <sub>5</sub> -H <sub>5</sub> ...O <sub>5</sub>    | 1.853    | 164.62  | 39.29          | C <sub>16</sub> -H <sub>16A</sub> ... $\pi_{C29-C34}$  | 3.128    | 87.12   | 23.26          |
| N <sub>3</sub> -H <sub>1</sub> ...O <sub>6</sub>    | 1.842    | 173.74  | 39.53          | C <sub>32</sub> -H <sub>32A</sub> ... $\pi_{N3-C15}$   | 3.380    | 101.44  | 21.54          |
| N <sub>5</sub> -H <sub>6</sub> ...O <sub>3</sub>    | 2.056    | 146.03  | 35.40          | C <sub>38</sub> -H <sub>38A</sub> ... $\pi_{C15-C20}$  | 3.364    | 77.20   | 21.75          |
| N <sub>2</sub> -H <sub>2</sub> ...O <sub>8</sub>    | 2.002    | 146.22  | 36.37          | C <sub>11</sub> -H <sub>11A</sub> ... $\pi_{C293-C34}$ | 3.310    | 85.17   | 22.83          |
| O <sub>9</sub> -H <sub>11</sub> ...O <sub>10</sub>  | 1.951    | 166.39  | 37.32          | $\pi_{C35-C40}$ ... $\pi_{C15-C20}$                    | 3.701    | 180.00  | 19.67          |

|                                                     |       |        |       |                                                      |       |        |       |
|-----------------------------------------------------|-------|--------|-------|------------------------------------------------------|-------|--------|-------|
| O <sub>9</sub> -H <sub>7</sub> ···O <sub>11</sub>   | 1.733 | 150.43 | 42.01 | $\pi_{C35-C40} \cdots \pi_{N3-C15}$                  | 3.402 | 180.00 | 21.40 |
| $\pi_{N6-C34} \cdots \pi_{C9-C14}$                  | 3.431 | 180.00 | 21.22 | $\pi_{N6-C34} \cdots \pi_{N3-C15}$                   | 3.583 | 180.00 | 20.32 |
| $\pi_{C29-C34} \cdots \pi_{C9-C14}$                 | 3.629 | 180.00 | 20.06 |                                                      |       |        |       |
| <b>5_mon</b>                                        |       |        |       |                                                      |       |        |       |
| N <sub>8</sub> -H <sub>8B</sub> ···N <sub>4</sub>   | 2.142 | 153.22 | 33.85 | $\pi_{C32-C37} \cdots \pi_{C13-C18}$                 | 3.683 | 180.00 | 19.77 |
| N <sub>6</sub> -H <sub>6A</sub> ···O <sub>4</sub>   | 2.025 | 140.74 | 35.94 | $\pi_{C32-C37} \cdots \pi_{N7-C19}$                  | 3.636 | 180.00 | 19.70 |
| N <sub>10</sub> -H <sub>10A</sub> ···O <sub>3</sub> | 2.048 | 154.29 | 35.55 | $\pi_{N9-C31} \cdots \pi_{C19-C24}$                  | 3.713 | 180.00 | 19.61 |
| N <sub>11</sub> -H <sub>11</sub> ···N <sub>5</sub>  | 1.903 | 167.62 | 38.24 | $\pi_{C26-C31} \cdots \pi_{C19-C24}$                 | 3.671 | 180.00 | 19.75 |
| N <sub>6</sub> -H <sub>6B</sub> ···O <sub>1</sub>   | 2.107 | 163.92 | 34.56 | $\pi_{C45-C50} \cdots \pi_{N7-C19}$                  | 3.675 | 180.00 | 19.81 |
| OW <sub>1</sub> -H···O <sub>3</sub>                 | 1.821 | 159.03 | 39.98 | $\pi_{N9-C31} \cdots \pi_{N7-C19}$                   | 3.698 | 180.00 | 19.42 |
| OW <sub>2</sub> -H···N <sub>2</sub>                 | 1.906 | 172.13 | 38.21 | N <sub>11</sub> -H <sub>11</sub> ··· $\pi_{C13-C18}$ | 3.227 | 165.20 | 22.49 |
| OW <sub>4</sub> -H···O <sub>1</sub>                 | 1.877 | 166.78 | 38.79 | N <sub>7</sub> -H <sub>7</sub> ··· $\pi_{C45-C50}$   | 3.383 | 159.83 | 21.52 |
| OW <sub>5</sub> -H···O <sub>2</sub>                 | 1.859 | 164.90 | 39.16 | C <sub>14</sub> -H <sub>14</sub> ··· $\pi_{C39-C44}$ | 3.519 | 168.38 | 20.69 |
| OW <sub>3</sub> -H···N <sub>3</sub>                 | 2.094 | 157.45 | 34.77 | C <sub>49</sub> -H <sub>49</sub> ··· $\pi_{C19-C24}$ | 3.430 | 169.47 | 21.23 |
| OW <sub>5</sub> -H···OW <sub>3</sub>                | 2.063 | 168.53 | 35.29 | N <sub>6</sub> -H <sub>6B</sub> ··· $\pi_{C39-C44}$  | 3.624 | 175.39 | 20.08 |

---

**Table S3.** The Non-Covalent Interactions Distances (Å), Angles (°), and Binding Energies (kcal mol<sup>-1</sup>) of **1\_CN** to **3\_CN**, and **2\_WCN** to **5\_WCN** calculated with B3LYP-D/ triple- $\zeta$  6-311+G(*d, p*).

| Interactions                                        | d(H...A) | < (DHA) | Binding Energy | Interactions                                            | d(H...A)    | < (DHA) | Binding Energy |
|-----------------------------------------------------|----------|---------|----------------|---------------------------------------------------------|-------------|---------|----------------|
| <b>1_CN</b>                                         |          |         |                |                                                         |             |         |                |
| N <sub>4</sub> -H <sub>4</sub> ...O <sub>2</sub>    | 1.910    | 162.24  | 37.70          | N <sub>3</sub> -H <sub>6</sub> ...O <sub>4</sub>        | 1.791       | 176.20  | 40.27          |
| N <sub>4</sub> -H <sub>5</sub> ...O <sub>3</sub>    | 1.749    | 176.81  | 40.89          | $\pi_{\text{N1-C6}} \cdots \pi_{\text{N1-C6}}$          | 3.493       | 180.00  | 20.22          |
| O <sub>5</sub> -H <sub>10</sub> ...O <sub>4</sub>   | 1.826    | 173.47  | 40.52          | C <sub>4</sub> -H <sub>2</sub> ... $\pi_{\text{N1-C6}}$ | 3.348       | 77.39   | 21.32          |
| O <sub>5</sub> -H <sub>9</sub> ...O <sub>2</sub>    | 1.928    | 177.56  | 38.53          |                                                         |             |         |                |
| <b>2_CN</b>                                         |          |         |                |                                                         |             |         |                |
| OW <sub>2</sub> -H <sub>12</sub> ...O <sub>2</sub>  | 1.954    | 167.22  | 37.26          | $\pi_{\text{C15-C20}} \cdots \pi_{\text{C9-C14}}$       | 3.487       | 180.00  | 21.14          |
| N <sub>2</sub> -H <sub>1</sub> ...O <sub>1</sub>    | 2.124    | 155.67  | 34.28          | $\pi_{\text{C8-N3}} \cdots \pi_{\text{C9-C14}}$         | 3.328       | 180.00  | 22.05          |
| N <sub>3</sub> -H <sub>14</sub> ...O <sub>2</sub>   | 1.830    | 171.24  | 39.79          | $\pi_{\text{N3-C15}} \cdots \pi_{\text{N3-C15}}$        | 3.315       | 180.00  | 21.91          |
| N <sub>2</sub> -H <sub>2</sub> ...O <sub>4</sub>    | 2.035    | 150.51  | 35.78          |                                                         |             |         |                |
| <b>2_WCN</b>                                        |          |         |                |                                                         |             |         |                |
| OW <sub>3</sub> -H <sub>15</sub> ...O <sub>1</sub>  | 1.726    | 166.87  | 40.48          | OW <sub>3</sub> -H <sub>18</sub> ...O <sub>4</sub>      | 1.937       | 159.30  | 37.59          |
| OW <sub>2</sub> -H <sub>16</sub> ...OW <sub>4</sub> | 1.903    | 163.47  | 36.70          | OW <sub>2</sub> -H <sub>12</sub> ...O <sub>2</sub>      | 1.968,1.947 | 156.28  | 36.97,38.04    |
| OW <sub>4</sub> -H <sub>17</sub> ...OW <sub>3</sub> | 1.837    | 177.12  | 37.90          | $\pi_{\text{N1-C6}} \cdots \pi_{\text{N1-C6}}$          | 3.498       | 180.00  | 20.81          |
| OW <sub>4</sub> -H <sub>19</sub> ...O <sub>3</sub>  | 2.104    | 171.50  | 34.61          |                                                         |             |         |                |

### 3\_CN

|                                                  |             |        |             |                                     |       |        |       |
|--------------------------------------------------|-------------|--------|-------------|-------------------------------------|-------|--------|-------|
| N <sub>3</sub> -H <sub>3</sub> ···O <sub>4</sub> | 1.922       | 174.64 | 37.88       | $\pi_{N1-C6} \cdots \pi_{N1-C6}$    | 3.561 | 180.00 | 20.45 |
| N <sub>2</sub> -H <sub>1</sub> ···O <sub>3</sub> | 2.050       | 153.27 | 35.51       | $\pi_{C15-C20} \cdots \pi_{C9-C14}$ | 3.439 | 180.00 | 21.17 |
| N <sub>2</sub> -H <sub>2</sub> ···O <sub>2</sub> | 1.981       | 148.15 | 36.75       | $\pi_{N3-C15} \cdots \pi_{C9-C14}$  | 3.308 | 180.00 | 22.01 |
| O <sub>5</sub> -H <sub>5</sub> ···O <sub>4</sub> | 1.876,1.952 | 171.39 | 38.81,37.30 | $\pi_{N3-C15} \cdots \pi_{N3-C15}$  | 3.281 | 180.00 | 22.19 |

### 3\_WCN

|                                                   |       |        |       |                                                   |       |        |       |
|---------------------------------------------------|-------|--------|-------|---------------------------------------------------|-------|--------|-------|
| O <sub>5</sub> -H <sub>5</sub> ···O <sub>4</sub>  | 1.953 | 174.27 | 37.28 | O <sub>7</sub> -H <sub>9</sub> ···O <sub>1</sub>  | 2.024 | 177.32 | 35.28 |
| O <sub>5</sub> -H <sub>4</sub> ···O <sub>7</sub>  | 1.869 | 157.12 | 38.03 | O <sub>7</sub> -H <sub>8</sub> ···O <sub>6</sub>  | 1.882 | 169.03 | 37.84 |
| O <sub>6</sub> -H <sub>7</sub> ···O <sub>3</sub>  | 1.859 | 167.29 | 38.73 | $\pi_{N1-C6} \cdots \pi_{N1-C6}$                  | 3.316 | 180.00 | 21.72 |
| O <sub>6</sub> -H <sub>10</sub> ···O <sub>2</sub> | 1.920 | 155.75 | 37.53 | C <sub>4</sub> -H <sub>4A</sub> ··· $\pi_{N1-C6}$ | 3.856 | 65.92  | 16.38 |

### 4\_WCN

|                                                   |       |        |       |                                                    |       |        |       |
|---------------------------------------------------|-------|--------|-------|----------------------------------------------------|-------|--------|-------|
| O <sub>9</sub> -H <sub>7</sub> ···O <sub>11</sub> | 1.708 | 150.94 | 43.64 | O <sub>11</sub> -H <sub>12</sub> ···O <sub>1</sub> | 1.856 | 159.23 | 40.83 |
|---------------------------------------------------|-------|--------|-------|----------------------------------------------------|-------|--------|-------|

### 5\_WCN

|                                                      |       |        |       |                                                    |       |        |       |
|------------------------------------------------------|-------|--------|-------|----------------------------------------------------|-------|--------|-------|
| OW <sub>1</sub> -H···N <sub>4</sub>                  | 2.038 | 161.44 | 35.70 | OW <sub>5</sub> -H···O <sub>2</sub>                | 1.980 | 161.43 | 36.48 |
| OW <sub>5</sub> -H···OW <sub>1</sub>                 | 1.983 | 169.97 | 36.81 | N <sub>8</sub> -H <sub>8A</sub> ···OW <sub>5</sub> | 2.209 | 162.75 | 32.46 |
| OW <sub>1</sub> -H···OW <sub>5</sub>                 | 2.048 | 160.68 | 33.85 | OW <sub>3</sub> -H···N <sub>3</sub>                | 2.133 | 173.83 | 33.83 |
| OW <sub>1</sub> -H···O <sub>3</sub>                  | 1.839 | 159.89 | 39.59 | OW <sub>2</sub> -H···N <sub>2</sub>                | 2.011 | 176.30 | 35.90 |
| N <sub>10</sub> -H <sub>10B</sub> ···OW <sub>2</sub> | 2.040 | 151.61 | 34.78 | N <sub>8</sub> -H <sub>8B</sub> ···N <sub>4</sub>  | 2.078 | 154.32 | 34.74 |
| OW <sub>2</sub> -H···OW <sub>3</sub>                 | 1.969 | 171.16 | 36.27 | N <sub>7</sub> -H <sub>7</sub> ···OW <sub>4</sub>  | 1.827 | 168.50 | 39.35 |
| OW <sub>3</sub> -H···OW <sub>2</sub>                 | 1.966 | 170.25 | 36.82 | OW <sub>4</sub> -H···O <sub>1</sub>                | 1.945 | 170.78 | 36.98 |
| OW <sub>5</sub> -H···OW <sub>3</sub>                 | 2.108 | 169.29 | 33.32 | OW <sub>4</sub> -H···O <sub>4</sub>                | 1.812 | 177.42 | 39.67 |

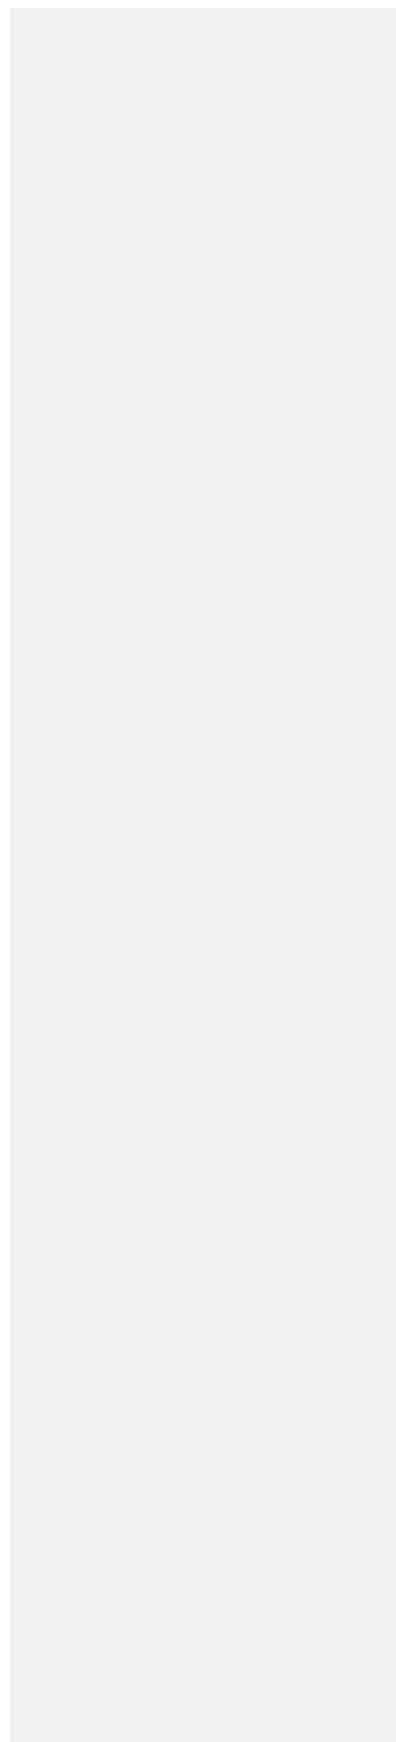

Supplement: c3ce40743h.pdf [file c3ce40743h.pdf]
